# Supplementary material
Source: HighWire-hosted journal article supplement (http://www.qdcxjkg.com/highwire/filestream/132077/field_highwire_adjunct_files/2/ERJ-02040-2015_Supplementary_Table_S2.pdf)
Supplement: ERJ-02040-2015_Supplementary_Table_S2.pdf [file ERJ-02040-2015_Supplementary_Table_S2.pdf]

Supplementary Table S2. Genotypes of cases and controls in the discovery and validation studies, and their association with the risk of lung cancer.

| Gene            | Polymorphism |     | Discovery              |                       |                        |                         | Validation             |                       |                        |                         | Combined               |                       |                        |                         |
|-----------------|--------------|-----|------------------------|-----------------------|------------------------|-------------------------|------------------------|-----------------------|------------------------|-------------------------|------------------------|-----------------------|------------------------|-------------------------|
|                 |              |     | Model, <i>P</i> -value |                       |                        |                         | Model, <i>P</i> -value |                       |                        |                         | Model, <i>P</i> -value |                       |                        |                         |
|                 |              |     | Global <sup>a</sup>    | Dominant <sup>b</sup> | Recessive <sup>b</sup> | Codominant <sup>b</sup> | Global <sup>a</sup>    | Dominant <sup>b</sup> | Recessive <sup>b</sup> | Codominant <sup>b</sup> | Global <sup>a</sup>    | Dominant <sup>b</sup> | Recessive <sup>b</sup> | Codominant <sup>b</sup> |
| <i>CIR1</i>     | rs13009079   | T/C | 0.01                   | 0.002                 | 0.04                   | 0.001                   | 0.02                   | 0.01                  | 0.93                   | 0.04                    | 0.0004                 | <.0001                | 0.14                   | <.0001                  |
| <i>SLC38A4</i>  | rs2429467    | C/T | 0.03                   | 0.01                  | 0.06                   | 0.01                    | 0.02                   | 0.01                  | 0.71                   | 0.07                    | 0.003                  | 0.001                 | 0.21                   | 0.001                   |
| <i>RRM1</i>     | rs1465952    | T/C | 0.04                   | 0.04                  | 0.21                   | 0.11                    | 0.25                   | 0.05                  | 0.95                   | 0.06                    | 0.01                   | 0.01                  | 0.24                   | 0.02                    |
| <i>RECK</i>     | rs16932912   | G/A | 0.0003                 | 0.33                  | 0.0003                 | 0.02                    | 0.81                   | 0.56                  | 0.84                   | 0.58                    | 0.01                   | 0.31                  | 0.00                   | 0.04                    |
| <i>SCGB3A1</i>  | rs307802     | T/C | 0.0004                 | 0.24                  | 0.002                  | 0.73                    | 0.01                   | 0.49                  | 0.003                  | 0.07                    | 0.20                   | 0.13                  | 1.00                   | 0.23                    |
| <i>SCGB1D2</i>  | rs2232946    | C/T | 0.001                  | 0.02                  | 0.002                  | 0.001                   | 0.76                   | 0.74                  | 0.52                   | 0.56                    | 0.08                   | 0.14                  | 0.062                  | 0.04                    |
| <i>CD3D</i>     | rs7947185    | T/C | 0.001                  | 0.01                  | 0.002                  | 0.001                   | 0.28                   | 0.56                  | 0.14                   | 0.32                    | 0.001                  | 0.03                  | 0.00                   | 0.002                   |
| <i>CRTC1</i>    | rs3746266    | T/C | 0.003                  | 0.002                 | 0.11                   | 0.001                   | 0.92                   | 0.54                  | 0.88                   | 0.62                    | 0.02                   | 0.01                  | 0.21                   | 0.005                   |
| <i>ROS1</i>     | rs1998206    | A/C | 0.003                  | 0.005                 | 0.44                   | 0.02                    | 0.61                   | 0.87                  | 0.28                   | 0.89                    | 0.07                   | 0.04                  | 1.00                   | 0.06                    |
| <i>BID</i>      | rs8190256    | A/C | 0.003                  | 0.004                 | 0.04                   | 0.002                   | 0.91                   | 0.85                  | 0.52                   | 0.74                    | 0.03                   | 0.05                  | 0.21                   | 0.04                    |
| <i>EDG1</i>     | rs3765684    | T/C | 0.003                  | 0.001                 | 0.37                   | 0.003                   | 0.62                   | 0.50                  | 0.62                   | 0.46                    | 0.14                   | 0.03                  | 0.77                   | 0.08                    |
| <i>MS4A1</i>    | rs11230333   | G/A | 0.004                  | 0.001                 | 0.48                   | 0.003                   | 0.99                   | 0.76                  | 0.92                   | 0.77                    | 0.06                   | 0.02                  | 0.67                   | 0.03                    |
| <i>PDGFRA</i>   | rs6554162    | G/A | 0.01                   | 0.17                  | 0.03                   | 0.86                    | 0.33                   | 0.16                  | 0.77                   | 0.30                    | 0.31                   | 0.97                  | 0.12                   | 0.55                    |
| <i>FGFR1</i>    | rs7825208    | A/G | 0.01                   | 0.39                  | 0.00                   | 0.07                    | 0.93                   | 0.74                  | 0.92                   | 0.75                    | 0.04                   | 0.38                  | 0.01                   | 0.10                    |
| <i>HK2</i>      | rs619850     | T/C | 0.01                   | 0.15                  | 0.00                   | 0.01                    | 0.01                   | 0.01                  | 0.39                   | 0.17                    | 0.01                   | 0.005                 | 0.06                   | 0.003                   |
| <i>TNK1</i>     | rs7219773    | C/A | 0.01                   | 0.02                  | 0.01                   | 0.004                   | 0.51                   | 0.73                  | 0.41                   | 0.97                    | 0.11                   | 0.05                  | 0.22                   | 0.04                    |
| <i>DST</i>      | rs4715631    | C/T | 0.01                   | 0.002                 | 0.21                   | 0.003                   | 0.38                   | 0.64                  | 0.18                   | 0.34                    | 0.01                   | 0.01                  | 0.05                   | 0.003                   |
| <i>PDGFRA</i>   | rs1800812    | G/T | 0.01                   | 0.60                  | 0.01                   | 0.63                    | 0.68                   | 0.30                  | 0.98                   | 0.36                    | 0.10                   | 0.62                  | 0.03                   | 0.25                    |
| <i>HSD17B11</i> | rs12644152   | G/A | 0.01                   | 0.01                  | 0.17                   | 0.01                    | 0.57                   | 0.54                  | 0.73                   | 0.74                    | 0.12                   | 0.12                  | 0.16                   | 0.07                    |
| <i>ITGB3</i>    | rs3809862    | C/T | 0.01                   | 0.08                  | 0.005                  | 0.01                    | 0.20                   | 0.06                  | 0.77                   | 0.19                    | 0.14                   | 0.77                  | 0.05                   | 0.17                    |
| <i>GUSB</i>     | rs9530       | C/T | 0.01                   | 0.01                  | 0.85                   | 0.01                    | 0.87                   | 0.96                  | 0.40                   | 0.86                    | 0.11                   | 0.05                  | 0.77                   | 0.06                    |
| <i>BIRC5</i>    | rs2071214    | A/G | 0.01                   | 0.04                  | 0.26                   | 0.21                    | 0.93                   | 0.70                  | 0.85                   | 0.70                    | 0.08                   | 0.19                  | 0.29                   | 0.50                    |
| <i>SULT2A1</i>  | rs2932766    | T/G | 0.01                   | 0.01                  | 0.12                   | 0.01                    | 0.50                   | 0.51                  | 0.31                   | 0.36                    | 0.02                   | 0.02                  | 0.06                   | 0.01                    |
| <i>BCL2A1</i>   | rs8026803    | T/C | 0.02                   | 0.01                  | 0.05                   | 0.005                   | 0.63                   | 0.60                  | 0.66                   | 0.56                    | 0.02                   | 0.01                  | 0.08                   | 0.01                    |
| <i>MMP27</i>    | rs2509010    | C/T | 0.02                   | 0.01                  | 0.81                   | 0.02                    | 0.23                   | 0.68                  | 0.08                   | 0.92                    | 0.17                   | 0.09                  | 0.28                   | 0.07                    |
| <i>METT11D1</i> | rs2297717    | C/G | 0.02                   | 0.01                  | 0.99                   | 0.01                    | 0.84                   | 0.74                  | 0.47                   | 0.63                    | 0.08                   | 0.02                  | 0.64                   | 0.02                    |
| <i>EDG1</i>     | rs3737578    | A/G | 0.02                   | 0.01                  | 0.75                   | 0.07                    | 0.36                   | 0.48                  | 0.26                   | 0.31                    | 0.22                   | 0.16                  | 0.34                   | 0.46                    |
| <i>N4BP2</i>    | rs1706023    | C/T | 0.02                   | 0.74                  | 0.01                   | 0.60                    | 0.02                   | 0.004                 | 0.15                   | 0.003                   | 0.04                   | 0.03                  | 0.40                   | 0.10                    |
| <i>BCL2A1</i>   | rs6495460    | T/C | 0.02                   | 0.03                  | 0.02                   | 0.01                    | 0.62                   | 0.88                  | 0.37                   | 0.79                    | 0.04                   | 0.11                  | 0.02                   | 0.02                    |
| <i>S100B</i>    | rs2186358    | A/C | 0.02                   | 0.02                  | 0.24                   | 0.01                    | 0.33                   | 0.27                  | 0.36                   | 0.44                    | 0.03                   | 0.01                  | 0.84                   | 0.02                    |
| <i>NTRK3</i>    | rs7176520    | C/T | 0.02                   | 0.01                  | 0.07                   | 0.01                    | 0.09                   | 0.08                  | 0.12                   | 0.04                    | 0.72                   | 0.48                  | 0.91                   | 0.62                    |
| <i>ERCC4</i>    | rs3136038    | C/T | 0.02                   | 0.61                  | 0.02                   | 0.58                    | 0.22                   | 0.61                  | 0.06                   | 0.26                    | 0.44                   | 0.45                  | 0.40                   | 0.78                    |
| <i>CTSC</i>     | rs3758833    | T/C | 0.02                   | 0.49                  | 0.003                  | 0.03                    | 0.44                   | 0.70                  | 0.38                   | 0.77                    | 0.45                   | 0.57                  | 0.13                   | 0.20                    |
| <i>XPC</i>      | rs2228001    | A/C | 0.02                   | 0.10                  | 0.09                   | 0.77                    | 0.40                   | 0.13                  | 0.89                   | 0.26                    | 0.23                   | 0.85                  | 0.15                   | 0.54                    |
| <i>XPC</i>      | rs3731054    | G/C | 0.03                   | 0.11                  | 0.01                   | 0.02                    | 0.26                   | 0.13                  | 0.38                   | 0.12                    | 0.01                   | 0.03                  | 0.01                   | 0.005                   |
| <i>EGF</i>      | rs4444903    | G/A | 0.03                   | 0.45                  | 0.02                   | 0.11                    | 0.47                   | 0.60                  | 0.14                   | 0.30                    | 0.41                   | 0.83                  | 0.29                   | 0.54                    |
| <i>CAP1</i>     | rs3122417    | C/T | 0.03                   | 0.13                  | 0.01                   | 0.02                    | 0.62                   | 0.35                  | 0.41                   | 0.28                    | 0.32                   | 0.58                  | 0.15                   | 0.28                    |
| <i>SLC38A4</i>  | rs11183610   | G/A | 0.03                   | 0.15                  | 0.97                   | 0.32                    | 0.24                   | 0.40                  | 0.12                   | 0.66                    | 0.77                   | 0.58                  | 0.81                   | 0.63                    |
| <i>RHOH</i>     | rs2276894    | C/G | 0.03                   | 0.01                  | 0.45                   | 0.01                    | 0.58                   | 0.52                  | 0.59                   | 0.67                    | 0.04                   | 0.02                  | 0.96                   | 0.03                    |
| <i>ALDH5A1</i>  | rs16889393   | G/A | 0.03                   | 0.22                  | 0.01                   | 0.07                    | 0.11                   | 0.11                  | 0.12                   | 0.06                    | 0.72                   | 0.98                  | 0.25                   | 0.76                    |

|                |            |     |      |      |      |      |      |      |      |      |      |      |      |      |
|----------------|------------|-----|------|------|------|------|------|------|------|------|------|------|------|------|
| <i>DAOA</i>    | rs778294   | G/A | 0.03 | 0.02 | 0.96 | 0.03 | 0.40 | 0.45 | 0.27 | 0.71 | 0.05 | 0.03 | 0.42 | 0.07 |
| <i>MGAT5</i>   | rs3762484  | T/C | 0.03 | 0.01 | 0.85 | 0.02 | 0.18 | 0.07 | 0.35 | 0.06 | 0.67 | 0.44 | 0.63 | 0.61 |
| <i>AGT</i>     | rs11122576 | A/G | 0.04 | 0.45 | 0.02 | 0.08 | 0.85 | 0.86 | 0.73 | 0.98 | 0.21 | 0.57 | 0.12 | 0.24 |
| <i>GSTA3</i>   | rs597169   | G/T | 0.04 | 0.01 | 0.59 | 0.03 | 0.55 | 0.72 | 0.27 | 0.42 | 0.17 | 0.06 | 0.79 | 0.22 |
| <i>CYP2R1</i>  | rs10741657 | G/A | 0.04 | 0.72 | 0.01 | 0.27 | 0.86 | 0.84 | 0.64 | 0.93 | 0.28 | 0.93 | 0.13 | 0.46 |
| <i>ANGPT2</i>  | rs2515507  | C/T | 0.04 | 0.29 | 0.98 | 0.18 | 0.11 | 0.09 | 0.98 | 0.07 | 0.24 | 0.81 | 0.24 | 0.95 |
| <i>POMT2</i>   | rs2193594  | A/G | 0.04 | 0.03 | 0.13 | 0.02 | 0.77 | 0.59 | 0.92 | 0.69 | 0.06 | 0.02 | 0.20 | 0.02 |
| <i>BCMO1</i>   | rs12934922 | A/T | 0.04 | 0.02 | 0.18 | 0.02 | 0.35 | 0.24 | 0.47 | 0.39 | 0.04 | 0.02 | 0.51 | 0.02 |
| <i>CASP14</i>  | rs11085944 | G/A | 0.04 | 0.71 | 0.04 | 0.74 | 0.81 | 0.77 | 0.62 | 0.91 | 0.29 | 0.88 | 0.15 | 0.77 |
| <i>VIP</i>     | rs688136   | T/C | 0.04 | 0.11 | 0.09 | 0.38 | 0.32 | 0.62 | 0.26 | 0.89 | 0.66 | 0.55 | 0.52 | 0.73 |
| <i>CD3E</i>    | rs2231439  | A/G | 0.04 | 0.04 | 0.02 | 0.01 | 0.12 | 0.42 | 0.12 | 0.96 | 0.03 | 0.30 | 0.01 | 0.05 |
| <i>NBN</i>     | rs12677527 | C/T | 0.04 | 0.72 | 0.02 | 0.26 | 0.21 | 0.48 | 0.08 | 0.14 | 0.01 | 0.75 | 0.01 | 0.07 |
| <i>HK2</i>     | rs608112   | G/A | 0.04 | 0.06 | 0.06 | 0.02 | 0.04 | 0.19 | 0.14 | 0.68 | 0.03 | 0.02 | 0.64 | 0.04 |
| <i>BRCA2</i>   | rs3092989  | G/A | 0.04 | 0.34 | 0.03 | 0.15 | 0.77 | 0.61 | 0.83 | 0.68 | 0.22 | 0.32 | 0.11 | 0.18 |
| <i>CASP14</i>  | rs3761057  | A/G | 0.04 | 0.85 | 0.04 | 0.62 | 0.88 | 0.94 | 0.65 | 0.95 | 0.26 | 0.85 | 0.14 | 0.79 |
| <i>PARP2</i>   | rs3093873  | C/T | 0.04 | 0.01 | 0.07 | 0.01 | 0.30 | 0.77 | 0.14 | 0.82 | 0.26 | 0.04 | 0.65 | 0.06 |
| <i>DHRS7</i>   | rs399535   | G/A | 0.05 | 0.87 | 0.02 | 0.20 | 0.01 | 0.02 | 0.13 | 0.31 | 0.19 | 0.11 | 0.38 | 0.11 |
| <i>AKAP13</i>  | rs2169876  | C/T | 0.05 | 0.01 | 0.93 | 0.02 | 0.96 | 0.93 | 0.57 | 0.80 | 0.15 | 0.09 | 0.58 | 0.18 |
| <i>GJA1</i>    | rs2071165  | G/A | 0.05 | 0.03 | 0.80 | 0.06 | 0.73 | 0.70 | 0.40 | 0.98 | 0.11 | 0.05 | 0.67 | 0.16 |
| <i>BNIP1</i>   | rs171725   | A/G | 0.05 | 0.02 | 0.15 | 0.01 | 0.98 | 0.88 | 0.95 | 0.91 | 0.22 | 0.08 | 0.32 | 0.06 |
| <i>FMO5</i>    | rs2289575  | G/C | 0.05 | 0.01 | 0.33 | 0.01 | 0.83 | 0.57 | 0.83 | 0.56 | 0.08 | 0.02 | 0.39 | 0.02 |
| <i>ITGB3</i>   | rs7208055  | C/A | 0.05 | 0.11 | 0.03 | 0.03 | 1.00 | 0.94 | 0.86 | 0.99 | 0.20 | 0.23 | 0.11 | 0.11 |
| <i>CALB1</i>   | rs3087750  | G/A | 0.05 | 0.56 | 0.04 | 0.70 | 0.42 | 0.62 | 0.41 | 0.94 | 0.60 | 0.97 | 0.32 | 0.71 |
| <i>ALDH5A1</i> | rs2744574  | T/C | 0.05 | 0.09 | 0.09 | 0.05 | 0.95 | 0.90 | 0.72 | 0.98 | 0.17 | 0.19 | 0.14 | 0.12 |
| <i>MYH11</i>   | rs16967494 | C/T | 0.05 | 0.19 | 0.02 | 0.04 | 0.75 | 0.86 | 0.49 | 0.82 | 0.08 | 0.40 | 0.03 | 0.09 |
| <i>BNIP3L</i>  | rs9644114  | A/G | 0.05 | 0.92 | 0.02 | 0.47 | 0.36 | 0.38 | 0.18 | 0.24 | 0.42 | 0.60 | 0.32 | 0.85 |
| <i>BCL6</i>    | rs16862537 | A/G | 0.05 | 0.37 | 0.04 | 0.12 | 0.40 | 0.25 | 0.27 | 0.17 | 0.03 | 0.13 | 0.03 | 0.04 |
| <i>RASGRF1</i> | rs13379704 | T/C | 0.05 | 0.03 | 0.36 | 0.07 | 0.07 | 0.15 | 0.98 | 0.08 | 0.06 | 0.01 | 0.66 | 0.01 |

Abbreviations: MAF, minor allele frequency

<sup>a</sup>Two-sided  $\chi^2$  test for genotype distributions between the cases and controls.

<sup>b</sup>Odds ratios (ORs), 95% confidence intervals (CIs) and *P*-values were calculated by unconditional logistic analysis, adjusted for age, sex, smoking status.
